# Supplementary material for: LimeMap: a comprehensive map of lipid mediator metabolic pathways
Source: PubMed Central journal article supplement (PMC7840682; doi:10.1038/s41540-020-00163-5), 2021-01-27
Supplement: 41540_2020_163_MOESM1_ESM.pdf [file 41540_2020_163_MOESM1_ESM.pdf]

## **LimeMap: a comprehensive map of lipid mediator metabolic pathways**

Akinori Nishi<sup>1</sup>, Katsuya Ohbuchi<sup>1</sup>, Noriko Kaifuchi<sup>1</sup>, Chika Shimobori<sup>1</sup>, Hirotake  
Kushida<sup>1</sup>, Masahiro Yamamoto<sup>1</sup>, Yoshihiro Kita<sup>2,3</sup>, Suzumi M. Tokuoka<sup>3</sup>, Ayako  
Yachie<sup>4</sup>, Yukiko Matsuoka<sup>4</sup>, Hiroaki Kitano<sup>4</sup>

1; Tsumura Kampo Research Laboratories, Tsumura & Co., Ibaraki, Japan.

2; Life Sciences Core Facility, Graduate School of Medicine, The University of Tokyo,  
Tokyo, Japan.

3; Department of Lipidomics, Graduate School of Medicine, The University of Tokyo,  
Tokyo, Japan.

4; The Systems Biology Institute, Shinagawa, Tokyo, Japan.

## **Supplementary Figure 1**

### **Lipid mediator metabolic pathway map (LimeMap)**

a) LA, EDA, DGLA and AEA derived lipid mediators, b) AA derived lipid mediators, and c) EPA and DHA derived lipid mediators

## **Supplementary Table 1**

List of abbreviations of the lipid metabolites shown in Fig. 1a

## **Supplementary Table 2**

List of measured metabolites

Of the 158 metabolites, 153 were included in the map. Oleoylethanolamide (OEA), azelaoyl-platelet activating factor (azelaoyl-PAF), PGE1-EA, PGK2, and 7,17-hydroxy-docosapentaenoic acid (7,17-hydroxy-DPA) were not included in the map.

## **Supplementary Table 3**

Metabolites detected in plasma

## **Supplementary Data**

LimeMap.xml

The files generated by CellDesigner software in XML format

LimeMap.gml

The files generated by VANTED software in GML format

# Supplementary Figure 1

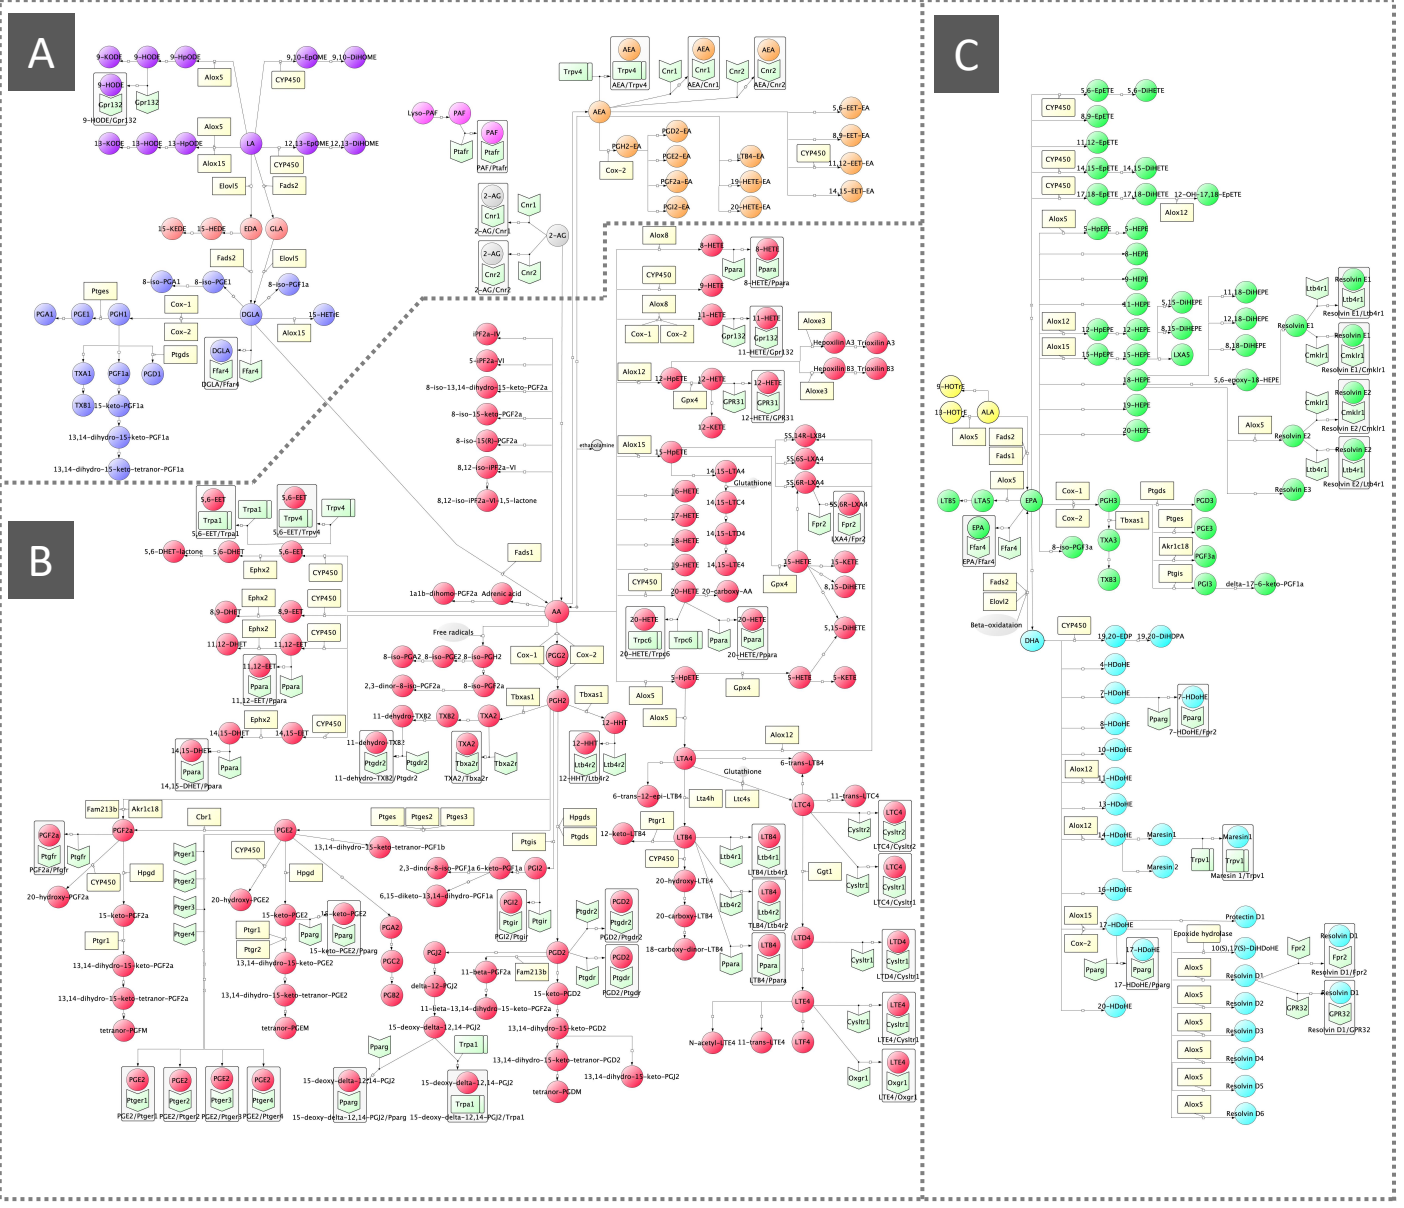



A

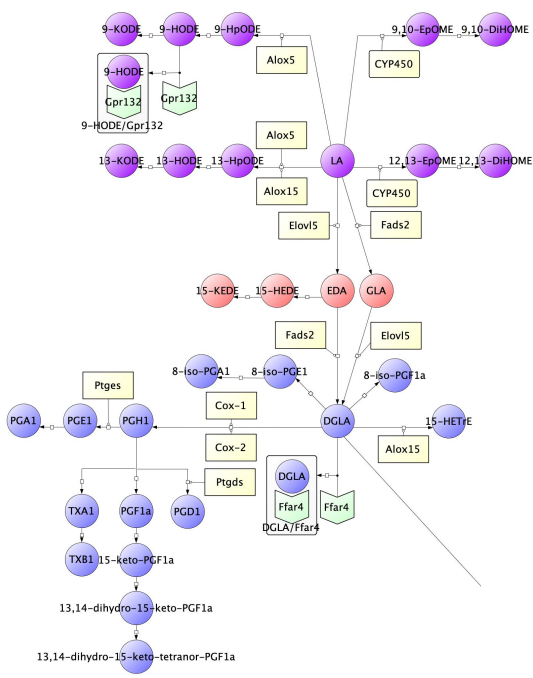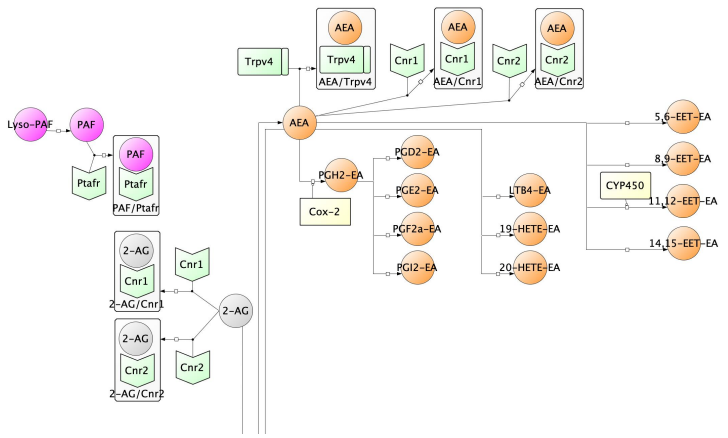

B

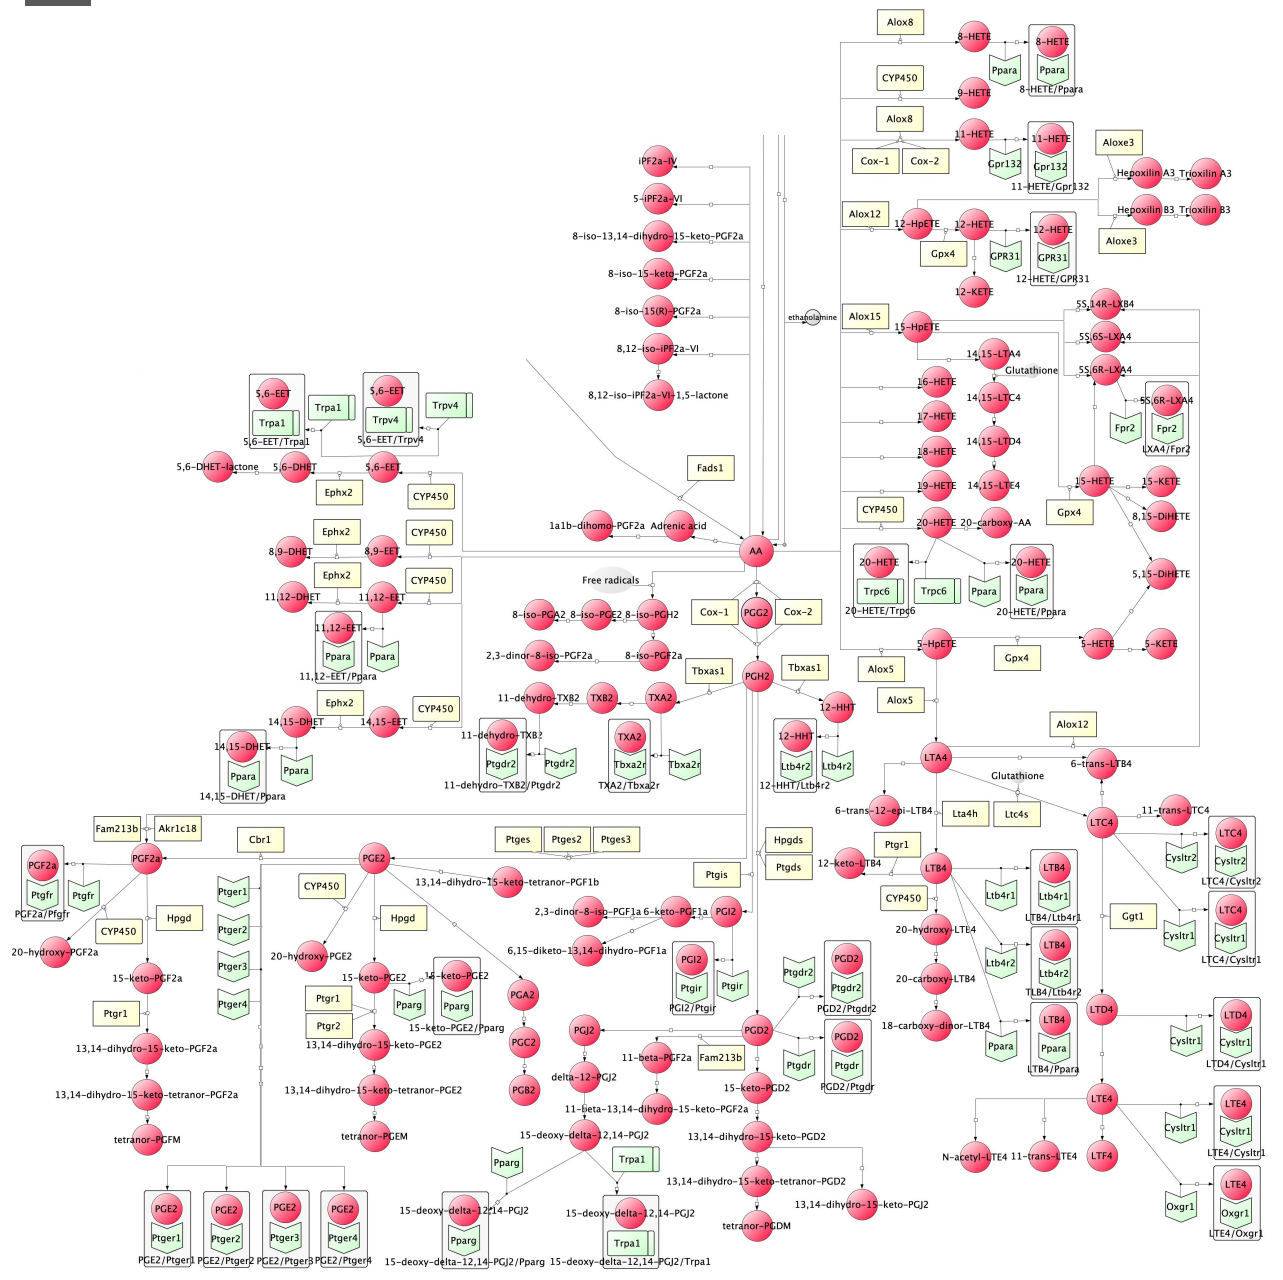





Supplementary Table 2

| Compound                             | Category | Compound                             | Category |
|--------------------------------------|----------|--------------------------------------|----------|
| AA                                   | AA       | 1a1b-dihomo-PGF2a                    | ADA      |
| iPF2a-IV                             | AA       | 9-HOTrE                              | ALA      |
| LTB4                                 | AA       | 13-HOTrE                             | ALA      |
| LTC4                                 | AA       | PGA1                                 | DGLA     |
| LTD4                                 | AA       | PGD1                                 | DGLA     |
| LTE4                                 | AA       | PGE1                                 | DGLA     |
| LTF4                                 | AA       | TXB1                                 | DGLA     |
| N-acetyl-LTE4                        | AA       | 8-iso-PGA1                           | DGLA     |
| PGA2                                 | AA       | 8-iso-PGE1                           | DGLA     |
| PGB2                                 | AA       | 8-iso-PGF1a                          | DGLA     |
| PGD2                                 | AA       | 13,14-dihydro-15-keto-tetranor-PGF1a | DGLA     |
| PGE2                                 | AA       | 15-HETrE                             | DGLA     |
| PGF2a                                | AA       | DHA                                  | DHA      |
| PGJ2                                 | AA       | Maresin1                             | DHA      |
| PGK2                                 | AA       | Resolvin D1                          | DHA      |
| tetranor-PGDM                        | AA       | Resolvin D2                          | DHA      |
| tetranor-PGEM                        | AA       | 4-HDoHE                              | DHA      |
| tetranor-PGFM                        | AA       | 7-HDoHE                              | DHA      |
| TXB2                                 | AA       | 7,17-hydroxy-DPA                     | DHA      |
| 2,3-dinor-8-iso-PGF2a                | AA       | 8-HDoHE                              | DHA      |
| 5-HETE                               | AA       | 10-HDoHE                             | DHA      |
| 5-HpETE                              | AA       | 10,17-DiHDoHE                        | DHA      |
| 5-iPF2a-VI                           | AA       | 11-HDoHE                             | DHA      |
| 5-KETE                               | AA       | 13-HDoHE                             | DHA      |
| 5,6-DHET                             | AA       | 14-HDoHE                             | DHA      |
| 5,6-DHET-lactone                     | AA       | 16-HDoHE                             | DHA      |
| 5,6-EET                              | AA       | 17-HDoHE                             | DHA      |
| 5S,6R-LXA4                           | AA       | 20-HDoHE                             | DHA      |
| 5S,6S-LXA4                           | AA       | AEA                                  | EA       |
| 5S,14R-LXB4                          | AA       | LTB4-EA                              | EA       |
| 5,15-DiHETE                          | AA       | OEa                                  | EA       |
| 6-keto-PGF1a                         | AA       | PGD2-EA                              | EA       |
| 6-trans-LTB4                         | AA       | PGE1-EA                              | EA       |
| 6,15-diketo-13,14-dihydro-PGF1a      | AA       | PGE2-EA                              | EA       |
| 8-HETE                               | AA       | PGF2a-EA                             | EA       |
| 8-iso-13,14-dihydro-15-keto-PGF2a    | AA       | 11,12-EET-EA                         | EA       |
| 8-iso-15-keto-PGF2a                  | AA       | 14,15-EET-EA                         | EA       |
| 8-iso-15(R)-PGF2a                    | AA       | 5,6-EET-EA                           | EA       |
| 8-iso-PGA2                           | AA       | 8,9-EET-EA                           | EA       |
| 8-iso-PGE2                           | AA       | 15-HEDE                              | EDA      |
| 8-iso-PGF2a                          | AA       | 15-KEDE                              | EDA      |
| 8,9-DHET                             | AA       | EPA                                  | EPA      |
| 8,9-EET                              | AA       | LXA5                                 | EPA      |
| 8,12-iso-iPF2a-VI-1,5-lactone        | AA       | PGD3                                 | EPA      |
| 8,15-DiHETE                          | AA       | PGE3                                 | EPA      |
| 9-HETE                               | AA       | PGF3a                                | EPA      |
| 11-beta-13,14-dihydro-15-keto-PGF2a  | AA       | TXB3                                 | EPA      |
| 11-beta-PGF2a                        | AA       | 5-HEPE                               | EPA      |
| 11-dehydro-TXB2                      | AA       | 5-HpEPE                              | EPA      |
| 11-HETE                              | AA       | 5,6-DiHETE                           | EPA      |
| 11-trans-LTC4                        | AA       | 8-iso-PGF3a                          | EPA      |
| 11-trans-LTE4                        | AA       | 12-HEPE                              | EPA      |
| 11,12-DHET                           | AA       | 12-HpEPE                             | EPA      |
| 11,12-EET                            | AA       | 14,15-DiHETE                         | EPA      |
| 12-HETE                              | AA       | 15-HEPE                              | EPA      |
| 12-HHT                               | AA       | 15-HpEPE                             | EPA      |
| 12-HpETE                             | AA       | 17,18-DiHETE                         | EPA      |
| 12-KETE                              | AA       | 17,18-EpETE                          | EPA      |
| 12-keto-LTB4                         | AA       | 18-HEPE                              | EPA      |
| 13,14-dihydro-15-keto-PGJ2           | AA       | 9-HODE                               | LA       |
| 13,14-dihydro-15-keto-PGD2           | AA       | 9-HpODE                              | LA       |
| 13,14-dihydro-15-keto-PGE2           | AA       | 9-KODE                               | LA       |
| 13,14-dihydro-15-keto-PGF2a          | AA       | 9,10-DiHOME                          | LA       |
| 13,14-dihydro-15-keto-tetranor-PGD2  | AA       | 9,10-EpOME                           | LA       |
| 13,14-dihydro-15-keto-tetranor-PGE2  | AA       | 12,13-DiHOME                         | LA       |
| 13,14-dihydro-15-keto-tetranor-PGF1b | AA       | 12,13-EpOME                          | LA       |
| 14,15-DHET                           | AA       | 13-HODE                              | LA       |
| 14,15-EET                            | AA       | 13-HpODE                             | LA       |
| 14,15-LTC4                           | AA       | 13-KODE                              | LA       |
| 14,15-LTE4                           | AA       | Azelaoyl-PAF                         | PAF      |
| 15-deoxy-delta-12,14-PGJ2            | AA       | Lyso-PAF                             | PAF      |
| 15-HETE                              | AA       | PAF                                  | PAF      |
| 15-HpETE                             | AA       |                                      |          |
| 15-keto-PGE2                         | AA       |                                      |          |
| 15-keto-PGF2a                        | AA       |                                      |          |
| 16-HETE                              | AA       |                                      |          |
| 17-HETE                              | AA       |                                      |          |
| 18-carboxy-dinor-LTB4                | AA       |                                      |          |
| 18-HETE                              | AA       |                                      |          |
| 19-HETE                              | AA       |                                      |          |
| 20-carboxy-AA                        | AA       |                                      |          |
| 20-carboxy-LTB4                      | AA       |                                      |          |
| 20-HETE                              | AA       |                                      |          |
| 20-hydroxy-LTB4                      | AA       |                                      |          |
| 20-hydroxy-PGE2                      | AA       |                                      |          |
| 20-hydroxy-PGF2a                     | AA       |                                      |          |

Supplementary Table 3

| Compound                        | category | Saline             | polyl:C             | polyl:C/Saline |                 |
|---------------------------------|----------|--------------------|---------------------|----------------|-----------------|
|                                 |          | peak intensity     | peak intensity      | log2FC         | Pvalue          |
| AA                              | AA       | 2.4583 ± 0.0942    | 2.2130 ± 0.05940    | <b>-0.152</b>  | <b>0.043775</b> |
| LTB4                            | AA       | 0.0032 ± 0.0009    | 0.0097 ± 0.00315    | 1.628          | 0.074824        |
| LTC4                            | AA       | 0.0009 ± 0.0002    | 0.0064 ± 0.00209    | <b>2.817</b>   | <b>0.029661</b> |
| LTE4                            | AA       | 0.0293 ± 0.0033    | 0.0439 ± 0.00938    | 0.586          | 0.171252        |
| PGA2                            | AA       | 0.0218 ± 0.0039    | 0.0457 ± 0.01980    | 1.069          | 0.267267        |
| PGD2                            | AA       | 0.0088 ± 0.0017    | 0.0314 ± 0.00630    | <b>1.841</b>   | <b>0.006876</b> |
| PGE2                            | AA       | 0.0134 ± 0.0039    | 0.0896 ± 0.06715    | 2.740          | 0.289681        |
| PGF2a                           | AA       | 0.0161 ± 0.0038    | 0.0271 ± 0.00674    | 0.750          | 0.179840        |
| PGJ2                            | AA       | 0.0146 ± 0.0033    | 0.0245 ± 0.00819    | 0.747          | 0.287320        |
| tetranor-PGDM                   | AA       | 0.0298 ± 0.0050    | 0.2884 ± 0.05008    | <b>3.273</b>   | <b>0.000834</b> |
| tetranor-PGEM                   | AA       | 0.0190 ± 0.0044    | 0.1589 ± 0.01263    | <b>3.067</b>   | <b>0.000001</b> |
| TXB2                            | AA       | 0.0212 ± 0.0077    | 0.0876 ± 0.05302    | 2.044          | 0.249257        |
| 5-HETE                          | AA       | 0.2896 ± 0.0218    | 0.2951 ± 0.02403    | 0.027          | 0.868848        |
| 5-KETE                          | AA       | 0.0007 ± 0.0001    | 0.0006 ± 0.00010    | -0.230         | 0.480527        |
| 5,6-DHET                        | AA       | 0.0120 ± 0.0018    | 0.0117 ± 0.00201    | -0.038         | 0.907611        |
| 6-keto-PGF1a                    | AA       | 0.1331 ± 0.0306    | 0.2831 ± 0.07616    | 1.089          | 0.096030        |
| 6,15-diketo-13,14-dihydro-PGF1a | AA       | 0.0551 ± 0.0159    | 0.1074 ± 0.02989    | 0.964          | 0.147416        |
| 8-HETE                          | AA       | 0.0419 ± 0.0048    | 0.0385 ± 0.00993    | -0.123         | 0.762805        |
| 8-iso-PGE2                      | AA       | 0.0032 ± 0.0004    | 0.0043 ± 0.00078    | 0.405          | 0.254525        |
| 8,9-DHET                        | AA       | 0.0281 ± 0.0019    | 0.0325 ± 0.00723    | 0.210          | 0.570419        |
| 8,12-iso-iPF2a-VI-1,5-lactone   | AA       | 0.0217 ± 0.0041    | 0.0284 ± 0.00475    | 0.391          | 0.299827        |
| 9-HETE                          | AA       | 0.0332 ± 0.0066    | 0.0277 ± 0.00558    | -0.262         | 0.532423        |
| 11-HETE                         | AA       | 0.0540 ± 0.0039    | 0.1343 ± 0.05783    | 1.315          | 0.202916        |
| 11,12-DHET                      | AA       | 0.0443 ± 0.0026    | 0.0492 ± 0.01094    | 0.152          | 0.672049        |
| 12-HETE                         | AA       | 0.2600 ± 0.0566    | 0.6349 ± 0.48095    | 1.288          | 0.460525        |
| 13,14-dihydro-15-keto-PGD2      | AA       | 0.0030 ± 0.0004    | 0.0068 ± 0.00275    | 1.200          | 0.200455        |
| 13,14-dihydro-15-keto-PGE2      | AA       | 0.0036 ± 0.0007    | 0.0648 ± 0.04334    | 4.167          | 0.195499        |
| 14,15-DHET                      | AA       | 0.1334 ± 0.0069    | 0.1180 ± 0.00860    | -0.177         | 0.180648        |
| 15-HETE                         | AA       | 0.0434 ± 0.0040    | 0.0549 ± 0.01290    | 0.340          | 0.414274        |
| 17-HETE                         | AA       | 0.0112 ± 0.0014    | 0.0106 ± 0.00216    | -0.074         | 0.831703        |
| 18-HETE                         | AA       | 0.0457 ± 0.0037    | 0.0399 ± 0.00592    | -0.196         | 0.419146        |
| 19-HETE                         | AA       | 0.0521 ± 0.0052    | 0.0363 ± 0.00478    | <b>-0.519</b>  | <b>0.039603</b> |
| 9-HOTrE                         | ALA      | 0.0177 ± 0.0014    | 0.0127 ± 0.00212    | -0.486         | 0.066292        |
| 13-HOTrE                        | ALA      | 0.0275 ± 0.0017    | 0.0246 ± 0.00378    | -0.162         | 0.497282        |
| PGE1                            | DGLA     | 0.0010 ± 0.0000    | 0.0012 ± 0.00012    | 0.153          | 0.346594        |
| 15-HETrE                        | DGLA     | 0.0742 ± 0.0093    | 0.0563 ± 0.01315    | -0.400         | 0.281867        |
| DHA                             | DHA      | 49.4411 ± 2.0103   | 39.5040 ± 2.36811   | <b>-0.324</b>  | <b>0.005518</b> |
| 4-HDoHE                         | DHA      | 0.4422 ± 0.0339    | 0.2958 ± 0.02942    | <b>-0.580</b>  | <b>0.004637</b> |
| 7-HDoHE                         | DHA      | 0.1424 ± 0.0135    | 0.1453 ± 0.02791    | 0.028          | 0.928751        |
| 8-HDoHE                         | DHA      | 0.2885 ± 0.0227    | 0.3118 ± 0.07608    | 0.112          | 0.775794        |
| 10-HDoHE                        | DHA      | 0.1086 ± 0.0087    | 0.0985 ± 0.01169    | -0.142         | 0.495708        |
| 11-HDoHE                        | DHA      | 0.1688 ± 0.0097    | 0.1319 ± 0.01594    | -0.356         | 0.068615        |
| 13-HDoHE                        | DHA      | 0.0482 ± 0.0054    | 0.0399 ± 0.00455    | -0.270         | 0.258550        |
| 14-HDoHE                        | DHA      | 0.1777 ± 0.0306    | 0.1297 ± 0.02690    | -0.454         | 0.255574        |
| 16-HDoHE                        | DHA      | 0.1111 ± 0.0094    | 0.1014 ± 0.00754    | -0.131         | 0.433638        |
| 17-HDoHE                        | DHA      | 0.0314 ± 0.0033    | 0.0238 ± 0.00419    | -0.400         | 0.171820        |
| 20-HDoHE                        | DHA      | 0.0943 ± 0.0051    | 0.0683 ± 0.00516    | <b>-0.466</b>  | <b>0.002236</b> |
| AEA                             | EA       | 0.0296 ± 0.0010    | 0.0289 ± 0.00216    | -0.033         | 0.781035        |
| OEA                             | EA       | 0.8030 ± 0.0245    | 0.7013 ± 0.02687    | <b>-0.195</b>  | <b>0.012635</b> |
| 15-KEDE                         | EDA      | 0.0038 ± 0.0003    | 0.0033 ± 0.00027    | -0.189         | 0.283460        |
| EPA                             | EPA      | 2.4065 ± 0.1255    | 1.8300 ± 0.11654    | <b>-0.395</b>  | <b>0.003674</b> |
| 5-HEPE                          | EPA      | 0.1321 ± 0.0101    | 0.0964 ± 0.00940    | <b>-0.455</b>  | <b>0.018967</b> |
| 5,6-DiHETE                      | EPA      | 0.0216 ± 0.0016    | 0.0180 ± 0.00272    | -0.267         | 0.268515        |
| 12-HEPE                         | EPA      | 0.0955 ± 0.0205    | 0.0835 ± 0.03629    | -0.193         | 0.779326        |
| 14,15-DiHETE                    | EPA      | 0.0971 ± 0.0085    | 0.1119 ± 0.02864    | 0.204          | 0.632364        |
| 15-HEPE                         | EPA      | 0.1214 ± 0.0110    | 0.0869 ± 0.00953    | <b>-0.483</b>  | <b>0.030168</b> |
| 17,18-DiHETE                    | EPA      | 0.2843 ± 0.0197    | 0.3523 ± 0.10637    | 0.309          | 0.545891        |
| 18-HEPE                         | EPA      | 0.0814 ± 0.0069    | 0.0623 ± 0.00887    | -0.386         | 0.108635        |
| 9-HODE                          | LA       | 0.4210 ± 0.0266    | 0.3023 ± 0.03110    | <b>-0.478</b>  | <b>0.010271</b> |
| 9-KODE                          | LA       | 0.0505 ± 0.0071    | 0.0406 ± 0.00744    | -0.314         | 0.351568        |
| 9,10-DiHOME                     | LA       | 7.0738 ± 0.4437    | 5.4276 ± 0.75189    | -0.382         | 0.081670        |
| 12,13-DiHOME                    | LA       | 7.6443 ± 0.5574    | 5.8861 ± 0.90402    | -0.377         | 0.120877        |
| 13-HODE                         | LA       | 1.8456 ± 0.1328    | 1.2792 ± 0.12717    | <b>-0.529</b>  | <b>0.006785</b> |
| 13-KODE                         | LA       | 0.1596 ± 0.0169    | 0.1117 ± 0.01761    | -0.514         | 0.067007        |
| Azelaoyl-PAF                    | PAF      | 0.1009 ± 0.0138    | 0.0968 ± 0.00924    | -0.060         | 0.806307        |
| Lyso-PAF                        | PAF      | 818.4672 ± 18.0827 | 793.2767 ± 30.34829 | -0.045         | 0.488213        |
